# Supplementary material for: Role of microRNA 690 in Mediating Angiotensin II Effects on Inflammation and Endoplasmic Reticulum Stress
Source: PubMed Central journal article supplement (PMC7348980; doi:10.3390/cells9061327), 2020-05-26
Supplement: cells-09-01327-s001.pdf [file cells-09-01327-s001.pdf]

**Table S1.** Primer list used for mRNA quantification.

| <b>Primer</b>           | <b>Forward (5'-3') Sequence</b> | <b>Reverse (5'-3') Sequence</b> |
|-------------------------|---------------------------------|---------------------------------|
| Mouse <i>Chop</i>       | CCACCACACCTGAAAGCAGA            | AGGTGAAAGGCAGGGACTCA            |
| Mouse <i>Atf4</i>       | AAGCAGCAGAGTCAGGCTTTC           | GGGTTCTGTCTTCCACTCCA            |
| Mouse <i>Bip</i>        | TTCAGCCAATTATCAGCAAACCTCT       | TTTTCTGATGTATCCTCTTCACCAGT      |
| Mouse <i>Il6</i>        | AACCGCTATGAAGTTCCTCTC           | TCCTCTGTGAAGTCTCCTCTC           |
| Mouse <i>NFkB</i>       | GGTGAAGGTCGGTGTGAAC             | TGAGTGGAGTCATACTGGAACA          |
| Mouse <i>Map2k3</i>     | AGCACTTACCTACAGCCATAA           | CAGAGACCGACAGGAACA              |
| Mouse <i>Mapk14/p38</i> | AAGAGCCTGACCTATGATGAA           | AGTGAAGTGAGATAGACAGAACA         |
| Mouse <i>Map3k7</i>     | ACGCTGTGGTCTAAGGA               | AGGATACTGTAACGGCTCAT            |
| Mouse <i>Hdac4</i>      | CCATTGAGAGTGAGGAGGAA            | GGCTTGCTGTCTGAAGAG              |
| Mouse <i>Atf6</i>       | TGCCAAGGAGAAGATACCA             | CACAGCCACAGTCACATC              |
| Mouse <i>Gapdh</i>      | CTGAGTGGAGTCATACTGGAACA         | GGTGAAGGTCGGTGTGAAC             |
| Mouse <i>18S</i>        | GGACAGGATTGACAGATTGATAGC        | TGCCAGAGTCTCGTTCGTTA            |

**Table S2.** The primers used for plasmid generation.

| <b>Primer</b>            | <b>Forward (5'-3') Sequence</b>    | <b>Reverse (5'-3') Sequence</b>               |
|--------------------------|------------------------------------|-----------------------------------------------|
| psiCHECK2                | CCTAACACCGAGTTCGTGAAGGT            | CCCGCGTCAGACAAACCCTA                          |
| Mouse MAP2K3 UTR         | aattctaggcgatcgcTCAGGGGCTCCCAGCCAG | ttttattgcgccagcCTCTCAGGAAAGTCTTAGGAGATTCATCCC |
| Mouse MAP2K3 mutagenesis | aaaGGTACTGTCCCTGGATGCC             | ttatTGGCCTGTCCAGAGAGAC                        |
| Mouse MAP3K7 UTR         | aattctaggcgatcgcAGGTCTGCATCCTACAAC | ttttattgcgccagcGTAGAACAGGAATTAGTGAC           |
